# Supplementary material for: Atomic Layer Deposition of GdCoO3 and Gd0.9Ca0.1CoO3
Source: MDPI journal article supplement (doi:10.3390/ma13010024), 2019-12-19

Supplementary Materials

# Atomic Layer Deposition of $\text{GdCoO}_3$ and $\text{Gd}_{0.9}\text{Ca}_{0.1}\text{CoO}_3$

Marion Duparc, Henrik Hovde Sønsteby, Ola Nilsen, Anja Olafsen Sjøstad and Helmer Fjellvåg

Centre for Materials Science and Nanotechnology, Department of Chemistry, University of Oslo, 0315 Oslo, Norway; m.j.l.duparc@smn.uio.no (M.D.); h.h.sonsteby@kjemi.uio.no (H.H.S.); ola.nilsen@kjemi.uio.no (O.N.); a.o.sjastad@kjemi.uio.no (A.O.S.); helmer.fjellvag@kjemi.uio.no (H.F.)

\* Correspondence: helmer.fjellvag@kjemi.uio.no

Received: 16 November 2019; Accepted: 16 December 2019; Published: date

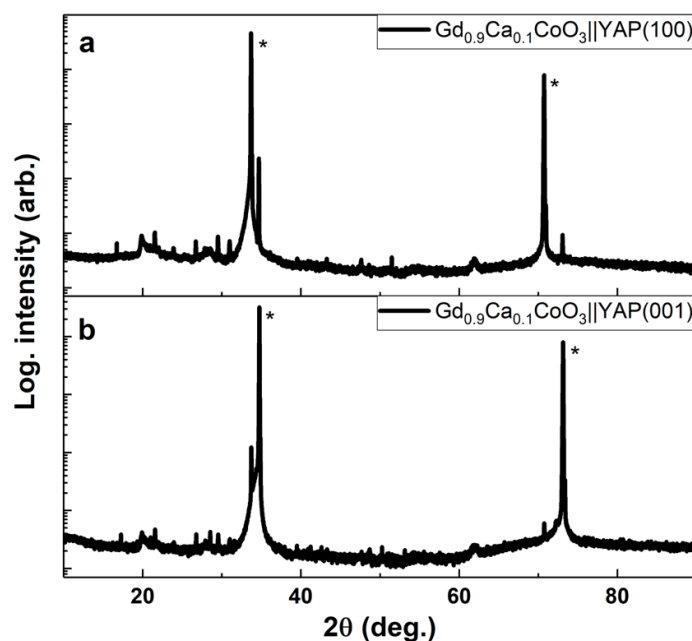

**Figure S1.** XRD patterns of 30 nm  $\text{Gd}_{0.9}\text{Ca}_{0.1}\text{CoO}_3$  films grown on (a) YAP(100) and (b) YAP(001), post-annealed for 30 minutes at 650 °C. Identified Bragg-reflections originating from the substrate are marked with a star.

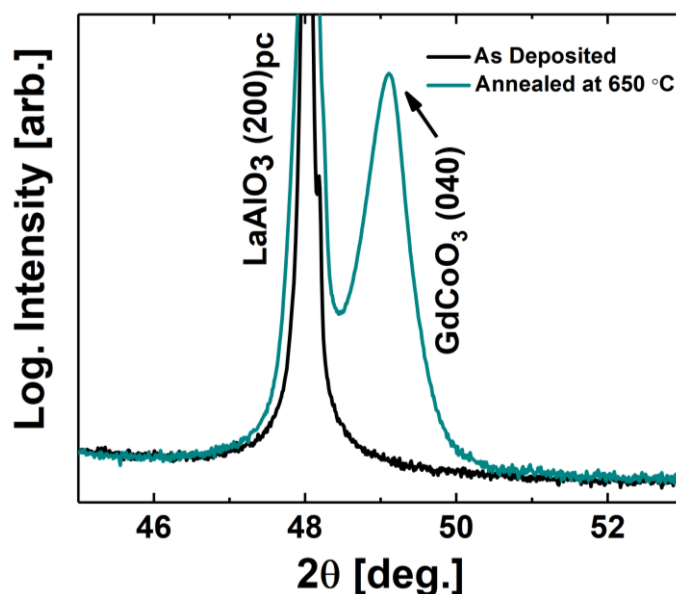

**Figure S2.** XRD pattern of the GdCoO<sub>3</sub> (040) reflection of as deposited (**black**) and annealed (**green**) 30 nm films grown on LAO (100)<sub>pc</sub>, used for Scherrer analysis of crystallite size.

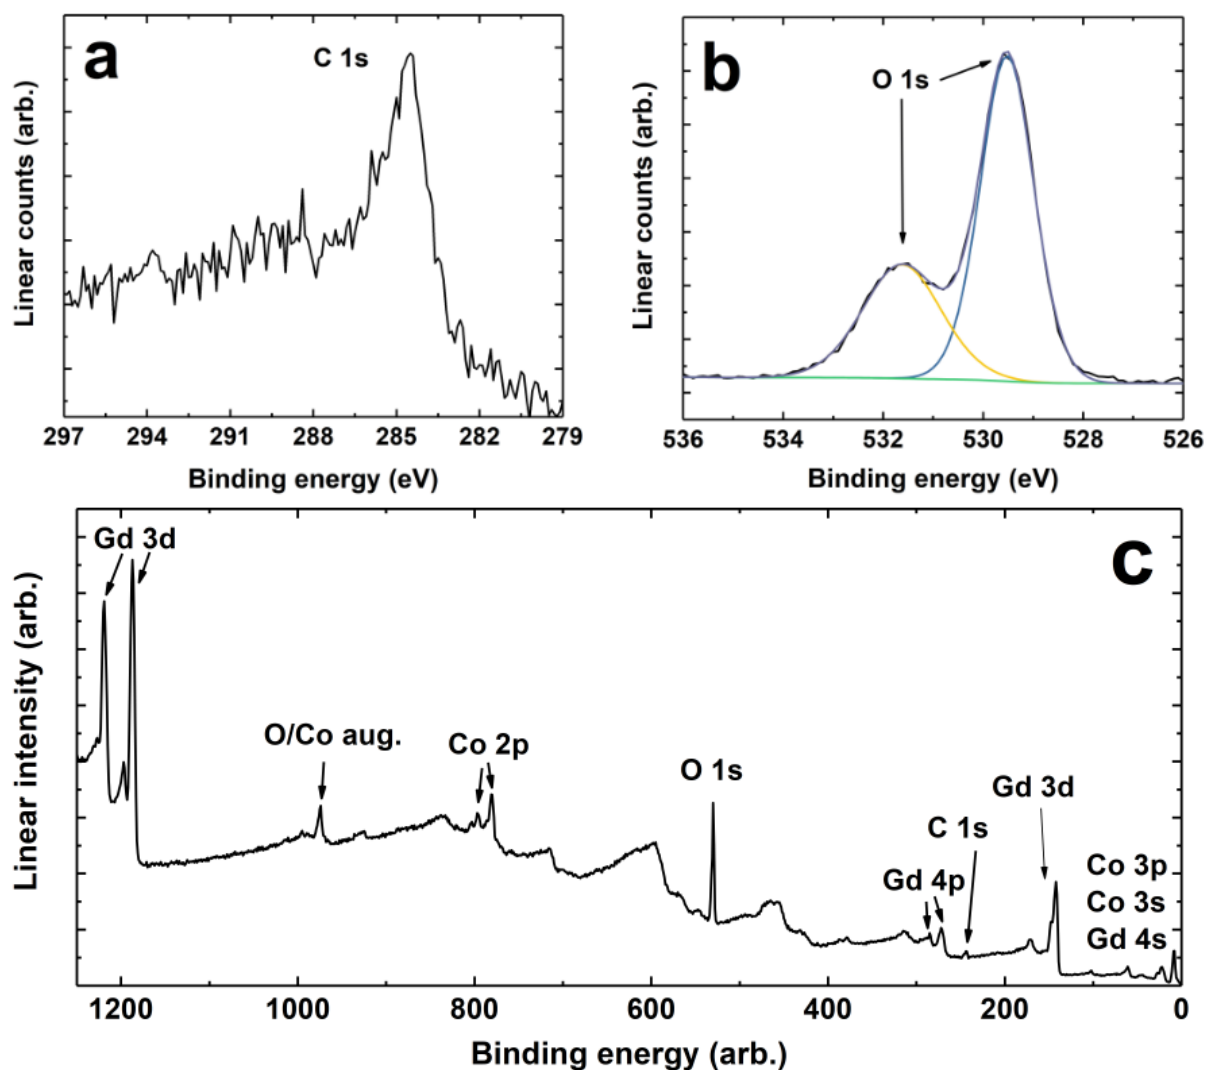

**Figure S3.** (a) XPS of C 1s, showing very weak signal pointing towards a very low carbon content. The carbon peak seems to stem from one species at 284.8 eV, attributed to adventitious carbon. (b) XPS of O 1s, showing a split peak which is attributed to the two distinct oxygen species in the GdCoO<sub>3</sub> structure. It is possible that some O is bonded to C on the surface as carbonate. (c) Survey spectra showing identification of Gd, Co, O and carbon species.

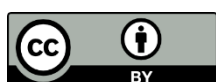

Supplement: s1 [file s1]
